# Supplementary material for: Enzyme-activated anchoring of peptide probes onto plasma membranes for selectively lighting up target cells
Source: Royal Society of Chemistry journal article supplement (doi:10.1039/d0an00487a), 2020-01-01
Supplement: d0an00487a1.pdf [file d0an00487a1.pdf]

## Supplementary information

### **Enzyme-activated anchorage of peptide probes on plasma membrane for selectively lighting up target cells**

Julan Xia<sup>#</sup>, Sujuan Sun<sup>#</sup>, Xianhua Wu, Yan Huang, Chunyang Lei\*, Zhou Nie

State Key Laboratory of Chemo/Biosensing and Chemometrics, College of Chemistry  
and Chemical Engineering, Hunan Provincial Key Laboratory of Biomacromolecular  
Chemical Biology, Hunan University, Changsha, 410082, P. R. China

\*Corresponding author. Email: cylei@hnu.edu.cn.

<sup>#</sup> These authors contributed equally to this work.

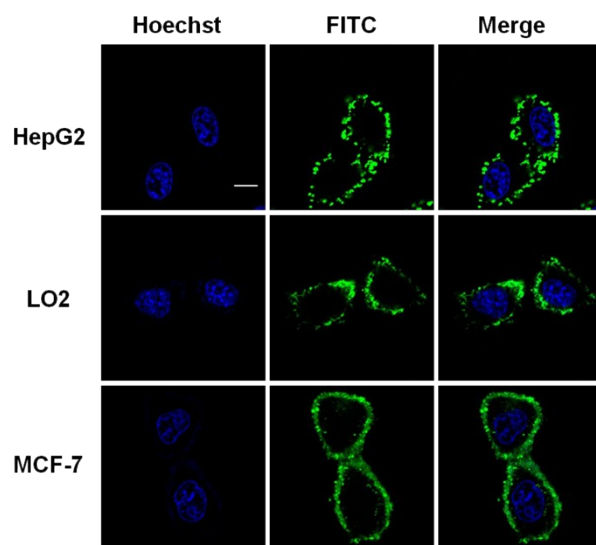

**Figure S1.** CLSM images of HepG2, LO2 and MCF-7 cells after the incubation with the MIP (20  $\mu$ M) at 37  $^{\circ}$ C for 2 h. The three columns are blue channel (Hoechst 33342), green channel (FITC), and merge of blue and green channels. Scale bar, 10  $\mu$ m.

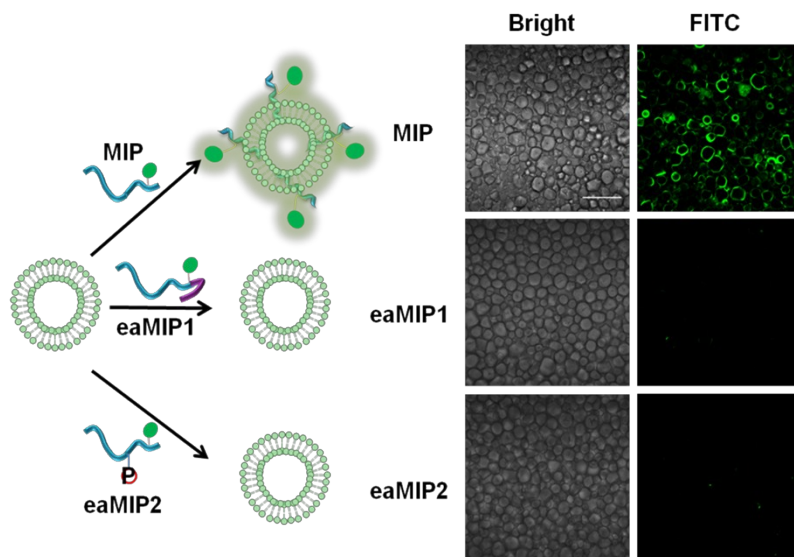

**Figure S2.** CLSM images of the vesicles after the incubation with different peptide probes (5  $\mu$ M) under a large field of view. Scale bar, 50  $\mu$ m.

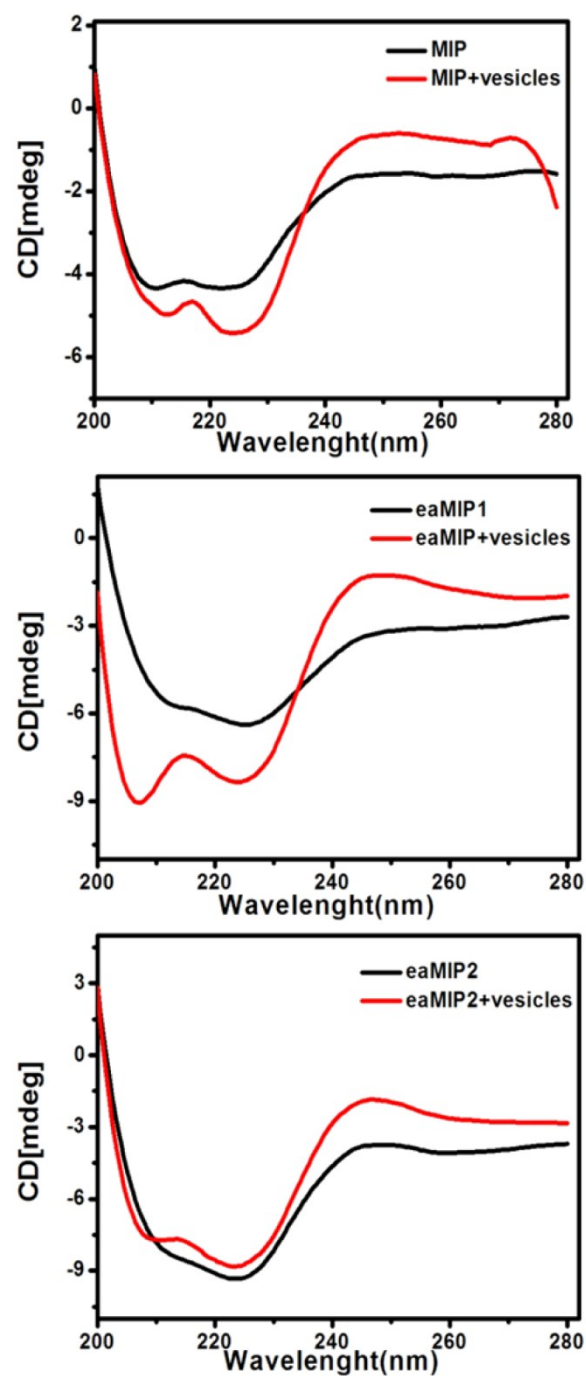

**Figure S3.** CD spectra of MIP, eaMIP1 and eaMIP2 before and after the incubation with vesicles. Peptide probes (10  $\mu$ M) were incubated with 2 mg/mL empty vesicles for 2 h before the CD measurements. The two negative bands around 210 nm and 224 nm are the characteristic absorption peaks of  $\alpha$ -helix secondary structure (H. Pan, et al. FASEB J., 2010, **24**, 2928-2937.).

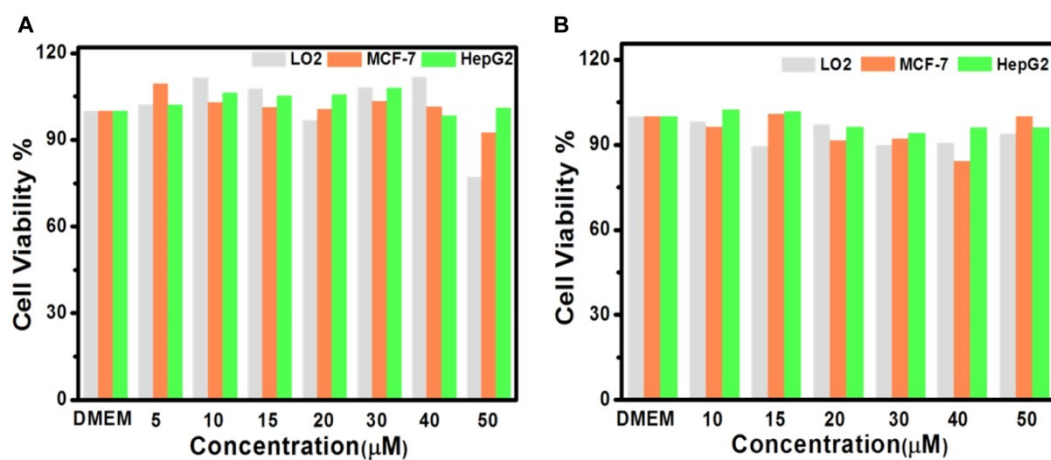

**Figure S4.** Cytotoxicity of eaMIPs on LO2, MCF-7 and HepG2 cells. Cell viability of cells after the incubation with (a) eaMIP1 and (b) eaMIP2 with different concentrations for 12 h.

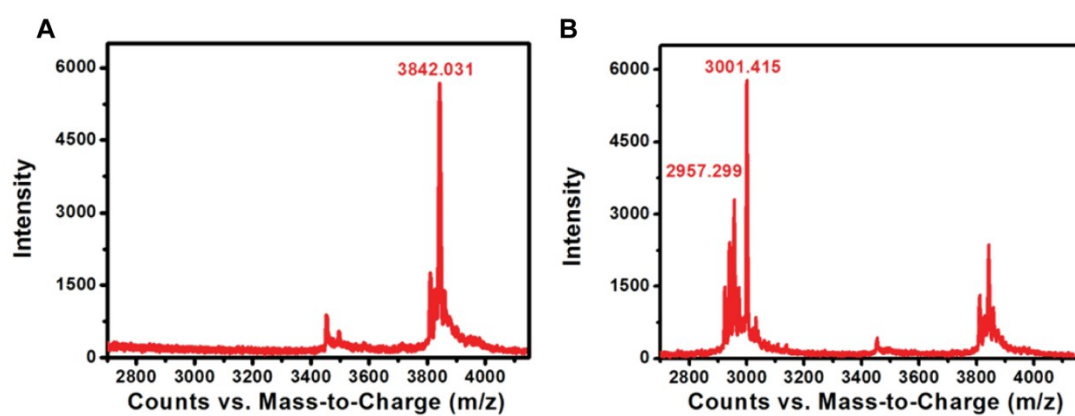

**Figure S5.** MALDI-TOF spectra of eaMIP1 (A) before and (B) after the treatment with MMP2.

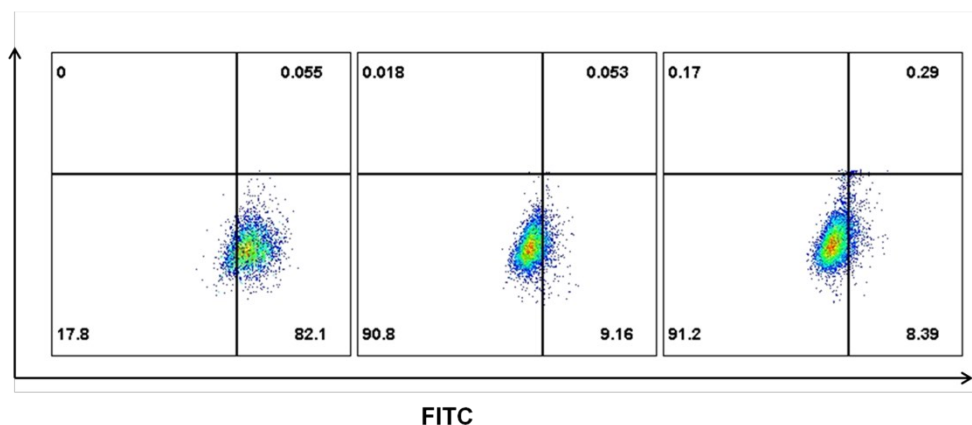

**Figure S6.** Flow cytometric analysis of HepG2, MCF-7 and LO2 cells after incubating with eaMIP1 (20  $\mu$ M) at 37  $^{\circ}$ C for 2.5 h.

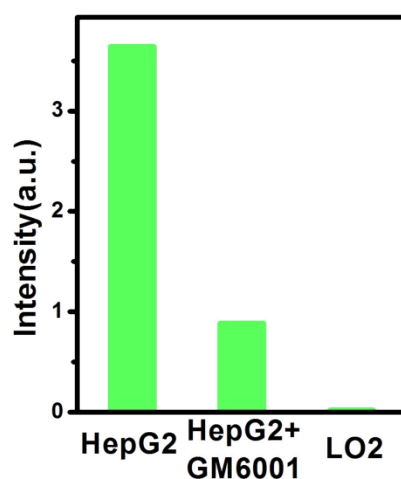

**Figure S7.** Average intensity of FITC channel on the membrane of HepG2 and LO2 cells. HepG2 cells were incubated with the eaMIP1 (20  $\mu$ M) in the absence or presence of GM6001 (100  $\mu$ M), and LO2 cells were incubated with the eaMIP1 at 37  $^{\circ}$ C for 2 h. The average green fluorescence intensity on cells membrane surface in the microscopic images were quantified by Image J software.

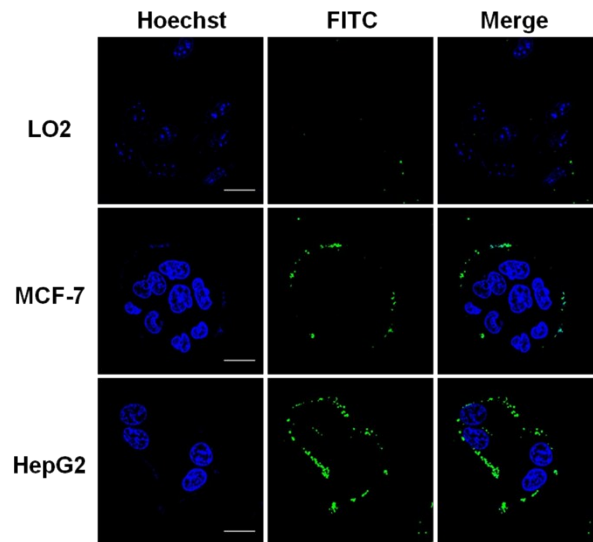

**Figure S8.** CLSM images of LO2, MCF-7 and HepG2 cells after incubation with the eaMIP2 (20  $\mu$ M) at 37  $^{\circ}$ C for 2.5 h. The three columns are blue channel (Hoechst 33342), green channel (FITC), and merge of blue and green channels. Scale bar, 20  $\mu$ m.

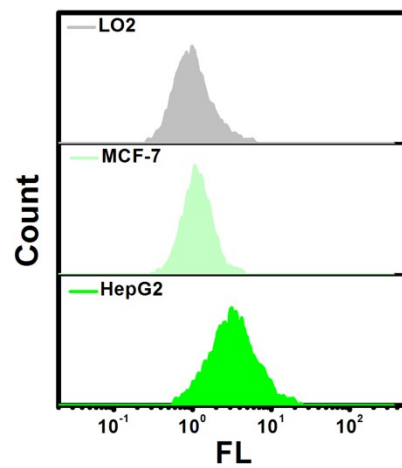

**Figure S9.** Flow cytometry analysis of the LO2, MCF-7 and HepG2 cells after the incubation with the eaMIP2 (20  $\mu$ M) at 37  $^{\circ}$ C for 2.5 h.
